# Supplementary material
Source: publisher site journal article supplement (https://www.spandidos-publications.com/7504/downloadSupplementary)
Supplement: Supplementary file 1 [file downloadSupplementary]

## Sheet: Sheet1
Table SI. Sequences of primers used for reverse transcription-quantitative PCR.
Gene	Forward, 5'-3'	Reverse 5'-3'
Rat GAPDH	TGGGAAGCTGGTCATCAACG	CCAGTGAGTTTCCCGTTCAG
Mouse GAPDH	TGTGTCCGTCGTGGATCTGA	GATGCCTGCTTCACCACCTT
Rat IL-1β	TGATGTTCCCATTAGACAGC	GAGGTGCTGATGTACCAGTT
Mouse IL-1β	CAACCAACAAGTGATATTCTCCATG	GATCCACACTCTCCAGCTGCA
Rat TNF-a	GTCGTAGCAAACCACCAAGC	CTCCTGGTATGAAATGGCAA
Mouse TNF- α	GCATGATCCGCGACGTGGAA	AGATCCATGCCGTTGGCCAG
Rat MCP-1	ATCCCAATGAGTAGGCTGGAGAGC	CAGAAGTGCTTGAGGTGGTTGTG
Mouse MCP-1	CACCTGCTGCTACTCATTCACT	GTTCTCTGTCATACTGGTCACTTCT
Rat ICAM-1	GCCCGGAGGATCACAAACGAC	CCTGGGGCTGGCATGTAAGAGT
Mouse ICAM-1	CACCCCAAGGACCCCAAGGAGAT	CGACGCCGCTCAGAAGAACCAC
MCP-1, monocyte chemoattractant protein-1; ICAM-1, intercellular adhesion molecule 1.
